# Supplementary material for: Decreased level of RASSF6 in sporadic colorectal cancer and its anti-tumor effects both in vitro and in vivo
Source: PubMed Central journal article supplement (PMC4991420; doi:10.18632/oncotarget.7852), 2016-03-02
Supplement: oncotarget-07-19813-s001.pdf [file oncotarget-07-19813-s001.pdf]

## Decreased level of RASSF6 in sporadic colorectal cancer and its anti-tumor effects both *in vitro* and *in vivo*

### Supplementary Materials

Sample ID: 5

**Adenocacinoma (-)**

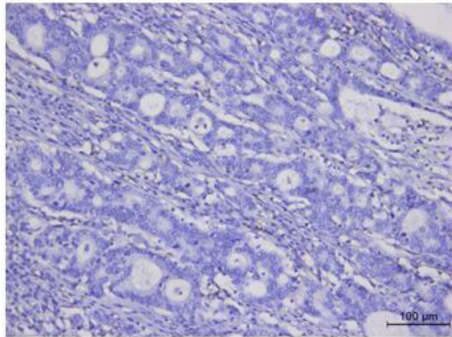

**Normal (++)**

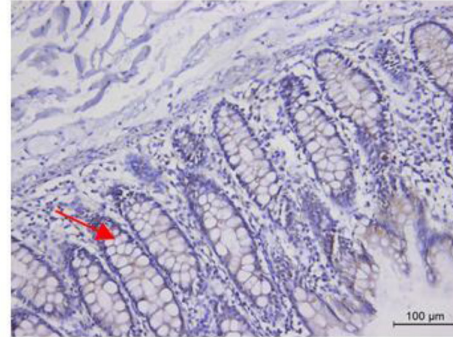

Sample ID: 41

**Adenocacinoma (+)**

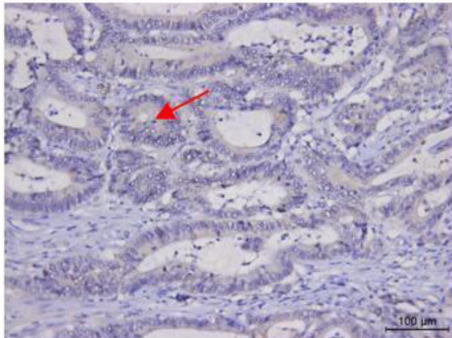

**Normal (+++)**

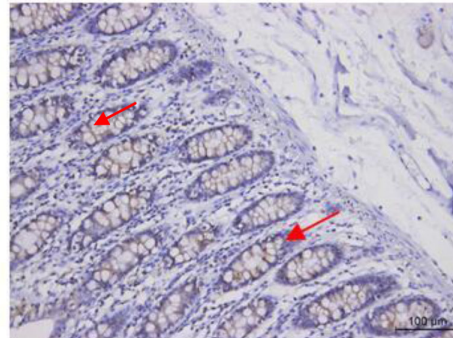

Sample ID: 52

**Adenocacinoma (+)**

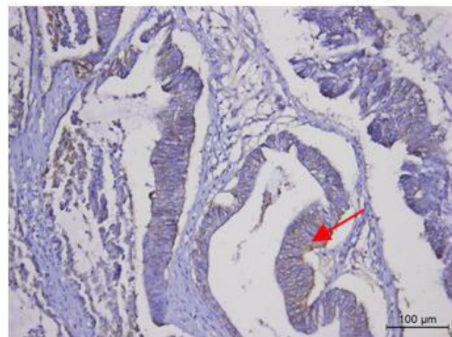

**Normal (++)**

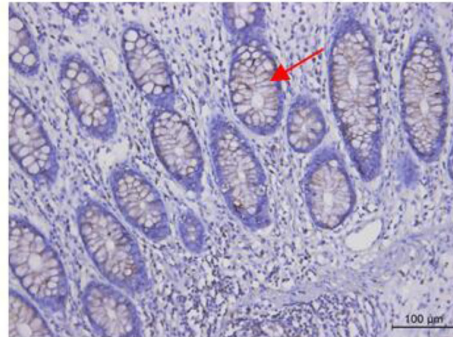

Supplementary Figure S1: Representative images of immunohistochemistry staining.

**Supplementary Table S1: Clinical data of 52 sCRC patients in tissue array**

| Sample ID | Age (years) | Gender | Stage at surgery | RASSF6 staining score |                        |
|-----------|-------------|--------|------------------|-----------------------|------------------------|
|           |             |        |                  | Adenocarcinoma        | Adjacent normal tissue |
| 1         | 52          | F      | II               | +                     | ++                     |
| 2         | 48          | M      | II               | -                     | ++                     |
| 3         | 32          | M      | II               | ++                    | ++                     |
| 4         | 56          | F      | II               | -                     | ++                     |
| 5         | 73          | F      | III              | -                     | ++                     |
| 6         | 45          | M      | II               | +                     | ++                     |
| 7         | 48          | M      | I                | +                     | +                      |
| 8         | 54          | F      | I                | ++                    | ++                     |
| 9         | 71          | M      | I                | +                     | ++                     |
| 10        | 70          | M      | I                | +                     | ++                     |
| 11        | 66          | F      | I                | +                     | +                      |
| 12        | 79          | M      | II               | +                     | +++                    |
| 13        | 35          | M      | III              | +                     | ++                     |
| 14        | 67          | F      | III              | +                     | ++                     |
| 15        | 65          | M      | II               | -                     | +++                    |
| 16        | 75          | M      | II               | -                     | +                      |
| 17        | 74          | M      | II               | +                     | ++                     |
| 18        | 34          | M      | I                | +                     | +                      |
| 19        | 62          | M      | I                | -                     | ++                     |
| 20        | 56          | M      | I                | ++                    | +                      |
| 21        | 85          | F      | I                | ++                    | ++                     |
| 22        | 61          | M      | I                | +                     | +++                    |
| 23        | 44          | M      | I                | +                     | ++                     |
| 24        | 55          | M      | I                | +                     | +                      |
| 25        | 57          | F      | I                | +                     | ++                     |
| 26        | 63          | M      | I                | +                     | ++                     |
| 27        | 60          | M      | II               | +                     | ++                     |
| 28        | 57          | M      | II               | +                     | ++                     |
| 29        | 72          | M      | I                | +                     | ++                     |
| 30        | 51          | F      | I                | ++                    | +                      |
| 31        | 52          | M      | I                | ++                    | ++                     |
| 32        | 71          | M      | I                | ++                    | ++                     |
| 33        | 61          | F      | I                | ++                    | ++                     |
| 34        | 51          | M      | I                | +                     | +                      |
| 35        | 62          | M      | I                | ++                    | ++                     |
| 36        | 64          | F      | I                | +                     | ++                     |

|    |    |   |     |    |     |
|----|----|---|-----|----|-----|
| 37 | 61 | F | I   | +  | ++  |
| 38 | 68 | F | I   | ++ | ++  |
| 39 | 57 | F | II  | -  | ++  |
| 40 | 74 | M | II  | ++ | ++  |
| 41 | 70 | M | II  | +  | +++ |
| 42 | 68 | F | II  | -  | +   |
| 43 | 28 | F | II  | ++ | ++  |
| 44 | 55 | M | II  | +  | ++  |
| 45 | 61 | F | II  | -  | ++  |
| 46 | 41 | M | III | +  | ++  |
| 47 | 51 | M | II  | -  | +   |
| 48 | 32 | M | I   | +  | ++  |
| 49 | 58 | F | I   | +  | ++  |
| 50 | 59 | M | I   | +  | ++  |
| 51 | 58 | M | I   | +  | ++  |
| 52 | 38 | F | I   | +  | ++  |

**Supplementary Table S2: Diagnostic mutation for hereditary CRC of Chinese Han population**

| Gene        | Exon | Allele change      | Effect      |
|-------------|------|--------------------|-------------|
| <i>MLH1</i> | 3    | c.298C > T         | Arg > Stop  |
|             | 3    | c.229T > C         | Cys > Arg   |
|             | 3    | c.250A > G         | Lys > Glu   |
|             | 6    | c.545 + 3A > G     | -           |
|             | 6    | 503_504insA        | Framshift   |
|             | 6    | c.472delA          | Frameshift  |
|             | 9    | c.790 + 1G > A     | Splice_site |
|             | 16   | c.1761_1762insG    | Frameshift  |
|             | 16   | c.1771delG         | Frameshift  |
|             | 16   | c.1846_1848delAAG  | Del Lys     |
|             | 19   | c.2172_2173insG    | Frameshift  |
|             | 19   | c.2263A > G        | Frameshift  |
| <i>MSH2</i> | 7    | c.1216_1219dupCGAC | Frameshift  |
|             | 12   | c.1808A > G        | Asp > Gly   |

**Supplementary Table S3: Amplification and sequencing primers used for deep sequencing**

| Exon | Product length | Amplification primers (5'-3')                                 | Sequencing primers (5'-3') |
|------|----------------|---------------------------------------------------------------|----------------------------|
| 2    | 265 bp         | F: GACACAACAAAACACTCAAC<br>R: TCATGCTTAGAAAACCTTGA            | GACACAACAAAACACTCAAC       |
| 3    | 230 bp         | F: GACAGAACAGTAAAGATTCC<br>R: GGATTGCCTTTCTTCAGTGG            | TGAAAGTACCATTATCACCTTTTACG |
| 4    | 371 bp         | F: GCCAAACAACAACCCTGGCG<br>R: ACAAGCTTAAGTTCCCTCC             | TATTTAGGTTTCTTACGCAC       |
| 5    | 297 bp         | F: TGGACAATATATCCACCTACAGAGG<br>R: GATTTTCAGAGAAACATATGGAGTCA | ACAGAGGCCACAGTATTAC        |
| 6    | 450 bp         | F: GCAGCTAAGCAGTGGACTAT<br>R: AAGATGTTAGACATGCTACT            | CACAGCCAGAAAATAGCAAT       |
| 7    | 246 bp         | F: TGACAATTCTTTTCTAGACATCA<br>R: CTTTCAGTGCTCAACATCCAA        | GATCTGTTTCAGAAGAGTGGA      |
| 8    | 301 bp         | F: TCCATAAGAGCAGAGAAGA<br>R: ATTCCTCCCCTTTCTCCACA             | ATGATTTGGGTCTGGTCAGG       |
| 9    | 297 bp         | F: GCCTCCTGTTGCAGGTGTTA<br>R: CTGAGTCAGGAGGGAAGCAA            | TTCAAAGTGAGTTAAATACGAAA    |
| 10   | 298 bp         | F: TTTTGCTTCCCTCCTGACTC<br>R: TCGCCTTTTCTTTATTGAATCTG         | TGGACATATTTTGTGCATTG       |
| 11   | 298 bp         | F: CAAGAGCATGCACATTGGATA<br>R: TGACATTCAATTTTCTACGATTCA       | TTCGTATAAATGCAAGTACA       |

**Supplementary Table S4: Primers used for quantitative real-time PCR**

| Gene          | Primer sequence 5'-3'                                  | Product length |
|---------------|--------------------------------------------------------|----------------|
| <i>RASSF6</i> | F: ATGGCAAATAATTGTTGAAGG<br>R: CAGGGTGTGCTGTGATAAGATAA | 260 bp         |
| <i>GAPDH</i>  | F: TGGAAATCCCATCACCATCT<br>R: TGGACTCCACGACGTACTCA     | 86 bp          |
